# Supplementary material
Source: Springer Nature journal article supplement (https://www.springermedizin.de/resource/supplementary/12913_2013_3504_MOESM4_ESM.pdf/9533040)
Supplement: MOESM4 [file 9533040]

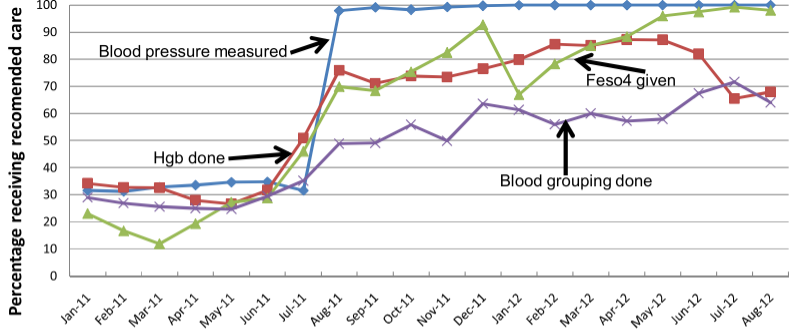

|                                                  | Jan-11 | Feb-11 | Mar-11 | Apr-11 | May-11 | Jun-11 | Jul-11 | Aug-11 | Sep-11 | Oct-11 | Nov-11 | Dec-11 | Jan-12 | Feb-12 | Mar-12 | Apr-12 | May-12 | Jun-12 | Jul-12 | Aug-12 |
|--------------------------------------------------|--------|--------|--------|--------|--------|--------|--------|--------|--------|--------|--------|--------|--------|--------|--------|--------|--------|--------|--------|--------|
| ◆ % pregnant women whose blood pressure measured | 32     | 31     | 33     | 34     | 35     | 35     | 32     | 98     | 99     | 98     | 99     | 100    | 100    | 100    | 100    | 100    | 100    | 100    | 100    | 100    |
| ■ % pregnant women with Hgb measured             | 34     | 33     | 33     | 28     | 27     | 32     | 51     | 76     | 71     | 74     | 73     | 77     | 80     | 86     | 85     | 87     | 87     | 82     | 66     | 68     |
| ▲ % pregnant women receiving 3 mo. supply iron   | 23     | 17     | 12     | 19     | 27     | 29     | 46     | 70     | 68     | 75     | 82     | 93     | 67     | 78     | 85     | 88     | 96     | 97     | 99     | 98     |
| ✕ % pregnant women w/ known blood group          | 29     | 27     | 26     | 25     | 25     | 30     | 35     | 49     | 49     | 56     | 50     | 64     | 61     | 56     | 60     | 57     | 58     | 67     | 72     | 64     |
